# Supplementary material
Source: publisher site journal article supplement (https://www.dovepress.com/article/259757)
Supplement: Supplementary file 1 [file get_supplementary_file.php]

## SUPPLEMENTAL MATERIAL

## Appendix 1. Codes for LDL-C testing and classifications of statin intensity

| Code  | Type  | Description                                   |
|-------|-------|-----------------------------------------------|
| 80061 | CPT   | Lipid panel                                   |
| 83721 | CPT   | LDL direct                                    |
| 82465 | CPT   | Cholesterol serum or whole blood total        |
| 3011F | CPT   | Lipid panel results documented and reviewed   |
| 3278F | CPT   | Lipid profile ordered                         |
| G8593 | HCPCS | Lipid profile results documented and reviewed |
| G8595 | HCPCS | Recent LDL <100                               |
| G8597 | HCPCS | Recent LDL >100                               |
| G8725 | HCPCS | Fasting lipid profile performed               |
| G8767 | HCPCS | Lipid panel results documented and reviewed   |
| G8893 | HCPCS | LDL not under control                         |
| G8890 | HCPCS | LDL under control                             |

| Statin Class Name | High (mg) | Moderate (mg) | Low (mg) |
|-------------------|-----------|---------------|----------|
| Atorvastatin      | 40-80     | 10-20         | NA       |
| Rosuvastatin      | 20-40     | 5-10          | NA       |
| Simvastatin       | 80*       | 20-40         | 5-10     |
| Pravastatin       | NA        | ≥40           | <40      |
| Lovastatin        | NA        | ≥40           | <40      |
| Fluvastatin XL    | NA        | 80            | 20-40    |
| Fluvastatin       | NA        | 40 BID        | 20-40    |
| Pitavastatin      | NA        | ≥2            | <2       |

\* Simvastatin 80mg was included as a high-intensity statin due to use in the study population prior to the 2011 warning.

## Appendix 2. R packages used in analysis

| Package Name  | Version   | Source           |
|---------------|-----------|------------------|
| BH            | 1.69.0-1  | CRAN             |
| DBI           | 1.0.0     | CRAN             |
| DT            | 0.5       | CRAN             |
| DiagrammeR    | 1.0.0     | CRAN             |
| Formula       | 1.2-3     | CRAN             |
| Hmisc         | 4.2-0     | CRAN             |
| MatrixModels  | 0.4-1     | CRAN             |
| R6            | 2.4.0     | CRAN             |
| RColorBrewer  | 1.1-2     | CRAN             |
| Rcpp          | 1.0.0     | CRAN             |
| Rook          | 1.1-1     | CRAN             |
| SparseM       | 1.77      | CRAN             |
| TH.data       | 1.0-10    | CRAN             |
| XML           | 3.98-1.17 | CRAN             |
| acepack       | 1.4.1     | CRAN             |
| askpass       | 1.1       | CRAN             |
| assertthat    | 0.2.0     | CRAN             |
| aws.s3        | 0.3.12    | CRAN             |
| aws.signature | 0.4.4     | CRAN             |
| backports     | 1.1.3     | CRAN             |
| base64enc     | 0.1-3     | CRAN             |
| brew          | 1.0-6     | CRAN             |
| broom         | 0.5.1     | CRAN             |
| checkmate     | 1.9.1     | CRAN             |
| cli           | 1.0.1     | CRAN             |
| clipr         | 0.5.0     | CRAN             |
| cohort        | 0.4.6     | cran.novisci.com |
| colorspace    | 1.4-0     | CRAN             |
| config        | 0.3       | CRAN             |
| confluenceR   | 0.3.0     | cran.novisci.com |
| crayon        | 1.3.4     | CRAN             |
| crosstalk     | 1.0.0     | CRAN             |
| curl          | 3.3       | CRAN             |
| data.table    | 1.12.0    | CRAN             |
| data.tree     | 0.7.8     | CRAN             |
| dbplyr        | 1.3.0     | CRAN             |
| digest        | 0.6.18    | CRAN             |
| doMC          | 1.3.5     | CRAN             |
| downloader    | 0.4       | CRAN             |
| dplyr         | 0.8.0.1   | CRAN             |
| ellipsis      | 0.1.0     | CRAN             |
| evaluate      | 0.13      | CRAN             |
| fansi         | 0.4.0     | CRAN             |
| flextable     | 0.5.1     | CRAN             |
| forcats       | 0.4.0     | CRAN             |
| foreach       | 1.4.4     | CRAN             |

|              |          |                  |
|--------------|----------|------------------|
| forge        | 0.1.0    | CRAN             |
| furrr        | 0.1.0    | CRAN             |
| future       | 1.11.1.1 | CRAN             |
| gdtools      | 0.1.7    | CRAN             |
| generics     | 0.0.2    | CRAN             |
| getPass      | 0.2-2    | CRAN             |
| ggplot2      | 3.1.0    | CRAN             |
| glmnet       | 2.0-16   | CRAN             |
| globals      | 0.12.4   | CRAN             |
| glue         | 1.3.0    | CRAN             |
| gridExtra    | 2.3      | CRAN             |
| gtable       | 0.2.0    | CRAN             |
| highr        | 0.7      | CRAN             |
| hms          | 0.4.2    | CRAN             |
| htmlTable    | 1.13.1   | CRAN             |
| htmltools    | 0.3.6    | CRAN             |
| htmlwidgets  | 1.3      | CRAN             |
| httpuv       | 1.4.5.1  | CRAN             |
| httr         | 1.4.0    | CRAN             |
| igraph       | 1.2.4    | CRAN             |
| influenceR   | 0.1.0    | CRAN             |
| ipwrisk      | 2.01     | cran.novisci.com |
| iterators    | 1.0.10   | CRAN             |
| jsonlite     | 1.6      | CRAN             |
| knitr        | 1.21     | CRAN             |
| labeling     | 0.3      | CRAN             |
| later        | 0.8.0    | CRAN             |
| latticeExtra | 0.6-28   | CRAN             |
| lazyeval     | 0.2.1    | CRAN             |
| listenv      | 0.7.0    | CRAN             |
| lubridate    | 1.7.4    | CRAN             |
| magick       | 2.0      | CRAN             |
| magrittr     | 1.5      | CRAN             |
| markdown     | 0.9      | CRAN             |
| mime         | 0.6      | CRAN             |
| multcomp     | 1.4-10   | CRAN             |
| munsell      | 0.5.0    | CRAN             |
| mvtnorm      | 1.0-10   | CRAN             |
| officer      | 0.3.3    | CRAN             |
| openssl      | 1.2.1    | CRAN             |
| packrat      | 0.5.0    | CRAN             |
| pillar       | 1.3.1    | CRAN             |
| pkgconfig    | 2.0.2    | CRAN             |
| plogr        | 0.2.0    | CRAN             |
| plyr         | 1.8.4    | CRAN             |
| polyspline   | 1.1.14   | CRAN             |
| promises     | 1.0.1    | CRAN             |
| pryr         | 0.1.4    | CRAN             |
| purrr        | 0.3.0    | CRAN             |

|             |        |      |
|-------------|--------|------|
| quantreg    | 5.38   | CRAN |
| r2d3        | 0.2.3  | CRAN |
| rappdirs    | 0.3.1  | CRAN |
| readr       | 1.3.1  | CRAN |
| reshape2    | 1.4.3  | CRAN |
| rgexf       | 0.15.3 | CRAN |
| rlang       | 0.3.1  | CRAN |
| rmarkdown   | 1.11   | CRAN |
| rms         | 5.1-3  | CRAN |
| rprojroot   | 1.3-2  | CRAN |
| rstudioapi  | 0.9.0  | CRAN |
| rvest       | 0.3.2  | CRAN |
| sandwich    | 2.5-0  | CRAN |
| scales      | 1.0.0  | CRAN |
| selectr     | 0.4-1  | CRAN |
| shiny       | 1.2.0  | CRAN |
| slackr      | 1.4.2  | CRAN |
| sourcetools | 0.1.7  | CRAN |
| sparklyr    | 0.9.4  | CRAN |
| stringi     | 1.3.1  | CRAN |
| stringr     | 1.4.0  | CRAN |
| sys         | 2.1    | CRAN |
| tibble      | 2.0.1  | CRAN |
| tidyr       | 0.8.2  | CRAN |
| tidyselect  | 0.2.5  | CRAN |
| tinytex     | 0.10   | CRAN |
| utf8        | 1.1.4  | CRAN |
| uuid        | 0.1-2  | CRAN |
| viridis     | 0.5.1  | CRAN |
| viridisLite | 0.3.0  | CRAN |
| visNetwork  | 2.0.5  | CRAN |
| withr       | 2.1.2  | CRAN |
| xfun        | 0.4    | CRAN |
| xml2        | 1.2.0  | CRAN |
| xtable      | 1.8-3  | CRAN |
| yaml        | 2.2.0  | CRAN |
| zip         | 2.0.1  | CRAN |
| zoo         | 1.8-4  | CRAN |

### **Appendix 3. Complete study report**

The complete study report is accessible at:

<http://docs.novisci.com/trends+in+ldl+testing+2008+2016>
